# Supplementary material for: Molecular cloning and expression analysis of tyrosinases (tyr) in four shell-color strains of Manila clam Ruditapes philippinarum
Source: PeerJ. 2020 Feb 17;8:e8641. doi: 10.7717/peerj.8641 (PMC7032058; doi:10.7717/peerj.8641)
Supplement: Supplemental Information 2 [file peerj-08-8641-s002.xlsx]

## Sheet: Sheet1
Four shell color strains, Zebra clam (z), Orange clam (o), White-zebra clam (wz), white clam (w).	Target Name	cp	actin cp
z	tyr6	30.6225	18.6464	11.9761	11.9761	0	-0.49532	1.40963
z	tyr6	30.4674	18.6464	11.821	11.9761	-0.155118
z	tyr6	29.2917	18.6464	10.6453	11.9761	-1.33084
o	tyr6	30.1898	24.4587	5.7311	11.9761	-6.24503	-6.6113	97.7685
o	tyr6	29.7529	24.4587	5.29425	11.9761	-6.68188
o	tyr6	29.5278	24.4587	5.06914	11.9761	-6.90698
wz	tyr6	26.6227	21.0185	5.60426	11.9761	-6.37187	-6.26224	76.7577
wz	tyr6	27.0246	21.0185	6.00618	11.9761	-5.96995
wz	tyr6	26.5497	21.0185	5.53123	11.9761	-6.4449
w	tyr6	30.3666	21.355	9.01159	11.9761	-2.96454	0.953792	0.516274
w	tyr6	36.6647	21.355	15.3096	11.9761	3.33351
w	tyr6	35.8236	21.355	14.4685	11.9761	2.4924
z	tyr9	32.6407	18.6464	13.9943	13.9943	0	-0.516354	1.43034
z	tyr9	30.0916	18.6464	11.4453	13.9943	-2.54906
z	tyr9	33.6407	18.6464	14.9943	13.9943	1
o	tyr9	35.5529	24.4587	11.0943	13.9943	-2.90005	-2.70389	6.51556
o	tyr9	35.757	24.4587	11.2984	13.9943	-2.69597
o	tyr9	35.9374	24.4587	11.4787	13.9943	-2.51565
wz	tyr9	29.7059	21.0185	8.68745	13.9943	-5.30689	-4.88923	29.635
wz	tyr9	29.0817	21.0185	8.06321	13.9943	-5.93113
wz	tyr9	31.5831	21.0185	10.5647	13.9943	-3.42967
w	tyr9	36.5158	21.355	15.1608	13.9943	1.16646	0.179853	0.882793
w	tyr9	35.0909	21.355	13.7359	13.9943	-0.258452
w	tyr9	34.9809	21.355	13.6259	13.9943	-0.368452
z	tyr10	26.6682	18.6464	8.02186	8.02186	0	-0.825525	1.77218
z	tyr10	25.6262	18.6464	6.97979	8.02186	-1.04208
z	tyr10	25.2337	18.6464	6.58736	8.02186	-1.4345
o	tyr10	26.6433	24.4587	2.18468	8.02186	-5.83719	-4.85781	28.9965
o	tyr10	27.6897	24.4587	3.23102	8.02186	-4.79084
o	tyr10	28.5351	24.4587	4.07647	8.02186	-3.94539
wz	tyr10	28.9302	21.0185	7.91174	8.02186	-0.110123	-0.869334	1.82682
wz	tyr10	27.2884	21.0185	6.26995	8.02186	-1.75192
wz	tyr10	28.2944	21.0185	7.2759	8.02186	-0.745964
w	tyr10	28.5116	21.355	7.1566	8.02186	-0.865265	-1.17504	2.25799
w	tyr10	27.8065	21.355	6.45146	8.02186	-1.5704
w	tyr10	28.2874	21.355	6.93241	8.02186	-1.08946
z	tyr11	27.5831	18.6464	8.93671	13.3154	-4.37873	-4.5068	22.7344
z	tyr11	27.0889	18.6464	8.44249	13.3154	-4.87296
z	tyr11	27.6931	18.6464	9.04672	13.3154	-4.26872
o	tyr11	34.2582	24.4587	9.79957	13.3154	-3.51587	-2.57597	5.96273
o	tyr11	36.7326	24.4587	12.274	13.3154	-1.04146
o	tyr11	34.6035	24.4587	10.1449	13.3154	-3.17059
wz	tyr11	34.3339	21.0185	13.3154	13.3154	0	-0.776731	1.71324
wz	tyr11	32.4946	21.0185	11.4761	13.3154	-1.83936
wz	tyr11	33.8431	21.0185	12.8246	13.3154	-0.490836
w	tyr11	36.1475	21.355	14.7924	13.3154	1.47701	-1.44752	2.72738
w	tyr11	31.9319	21.355	10.5769	13.3154	-2.73857
w	tyr11	31.5895	21.355	10.2345	13.3154	-3.08099
z	actin	18.6331
z	actin	18.6139
z	actin	18.6922
o	actin	24.4948
o	actin	24.4474
o	actin	24.4338
wz	actin	20.8745
wz	actin	21.0486
wz	actin	21.1323
w	actin	21.3692
w	actin	21.3067
w	actin	21.3892
Sample Name RNAi group (t), Control group (s),Negative control group (d),Time points(0h,24h,48h,72h,96h,120h).	Target Name	Cp
0t	tyr9	19.5266	30.0081	-10.4815	-6.07196	-4.40951	-3.60514	12.169
0t	tyr9	20.5845	30.0081	-9.42357	-6.07196	-3.35161
0t	tyr9	20.8818	30.0081	-9.12627	-6.07196	-3.0543
0s	tyr9	25.5277	30.9416	-5.41386	-6.07196	0.658103	0.372154	0.772628
0s	tyr9	24.7171	30.9416	-6.22447	-6.07196	-0.152502
0s	tyr9	25.4805	30.9416	-5.4611	-6.07196	0.610862
0d	tyr9	24.589	30.3745	-5.78552	-6.07196	0.286448	2.96059e-16	1
0d	tyr9	24.7269	30.3745	-5.6476	-6.07196	0.42436
0d	tyr9	23.5917	30.3745	-6.78277	-6.07196	-0.710808
24t	tyr9	23.3596	30.0631	-6.70348	-3.52859	-3.17489	-2.41728	5.34163
24t	tyr9	22.8126	30.0631	-7.2505	-3.52859	-3.72191
24t	tyr9	26.1795	30.0631	-3.88363	-3.52859	-0.355043
24s	tyr9	24.9701	30.3514	-5.38133	-3.52859	-1.85274	-1.20239	2.30121
24s	tyr9	26.1182	30.3514	-4.23316	-3.52859	-0.704576
24s	tyr9	25.773	30.3514	-4.57845	-3.52859	-1.04986
24d	tyr9	26.7278	30.812	-4.08424	-3.52859	-0.555652	0	1
24d	tyr9	27.3355	30.812	-3.47651	-3.52859	0.0520782
24d	tyr9	27.787	30.812	-3.02501	-3.52859	0.503574
48t	tyr9	22.8418	29.6236	-6.78178	-6.92918	0.1474	1.10743	0.464119
48t	tyr9	23.9798	29.6236	-5.64381	-6.92918	1.28537
48t	tyr9	24.584	29.6236	-5.03964	-6.92918	1.88954
48s	tyr9	22.6364	30.5741	-7.93768	-6.92918	-1.00851	0.157836	0.896369
48s	tyr9	24.5107	30.5741	-6.06345	-6.92918	0.865724
48s	tyr9	24.2612	30.5741	-6.31289	-6.92918	0.616288
48d	tyr9	26.7911	32.6127	-5.82161	-6.92918	1.10757	0	1
48d	tyr9	25.3422	32.6127	-7.27051	-6.92918	-0.341332
48d	tyr9	24.9173	32.6127	-7.69542	-6.92918	-0.766239
72t	tyr9	21.4679	29.0839	-7.61605	-8.45644	0.840384	0.97619	0.508321
72t	tyr9	21.5598	29.0839	-7.52413	-8.45644	0.932306
72t	tyr9	21.7834	29.0839	-7.30056	-8.45644	1.15588
72s	tyr9	25.3881	29.3437	-3.95565	-8.45644	4.50079	4.30813	0.0504805
72s	tyr9	25.4559	29.3437	-3.88783	-8.45644	4.5686
72s	tyr9	24.7423	29.3437	-4.60144	-8.45644	3.855
72d	tyr9	23.8651	32.4716	-8.60647	-8.45644	-0.150033	0	1
72d	tyr9	24.4812	32.4716	-7.99036	-8.45644	0.466077
72d	tyr9	23.6991	32.4716	-8.77248	-8.45644	-0.316044
96t	tyr9	27.2295	29.7909	-2.56144	-11.6028	9.0414	8.29517	0.0031835
96t	tyr9	25.6469	29.7909	-4.144	-11.6028	7.45884
96t	tyr9	26.5733	29.7909	-3.21757	-11.6028	8.38527
96s	tyr9	21.8227	31.823	-10.0003	-11.6028	1.6025	1.5134	0.350285
96s	tyr9	20.9074	31.823	-10.9156	-11.6028	0.687226
96s	tyr9	22.4706	31.823	-9.35238	-11.6028	2.25046
96d	tyr9	20.2982	32.4128	-12.1146	-11.6028	-0.511755	-1.77636e-15	1
96d	tyr9	21.8389	32.4128	-10.5738	-11.6028	1.02901
96d	tyr9	20.2927	32.4128	-12.1201	-11.6028	-0.517255
120t	tyr9	22.5682	30.4047	-7.83651	-2.16378	-5.67274	-4.21119	18.5222
120t	tyr9	24.93	30.4047	-5.47468	-2.16378	-3.3109
120t	tyr9	24.591	30.4047	-5.8137	-2.16378	-3.64992
120s	tyr9	30.9996	30.4047	0.594887	-2.16378	2.75866	2.42736	0.185906
120s	tyr9	30.7501	30.4047	0.345389	-2.16378	2.50916
120s	tyr9	30.2552	30.4047	-0.149529	-2.16378	2.01425
120d	tyr9	33.2314	35.9763	-2.74494	-2.16378	-0.581163	0	1
120d	tyr9	34.9749	35.9763	-1.00145	-2.16378	1.16233
120d	tyr9	33.2314	35.9763	-2.74494	-2.16378	-0.581163
0t	actin	30.3287	30.0081
0t	actin	30.1764
0t	actin	29.5193
0s	actin	29.9658	30.9416
0s	actin	29.9658
0s	actin	32.8932
0d	actin	32.2005	30.3745
0d	actin	28.7921
0d	actin	30.131
24t	actin	29.8495	30.0631
24t	actin	28.6579
24t	actin	31.682
24s	actin	29.82	30.3514
24s	actin	29.787
24s	actin	31.4472
24d	actin	30.4891	30.812
24d	actin	30.3073
24d	actin	31.6396
48t	actin	27.9138	29.6236
48t	actin	31.6413
48t	actin	29.3158
48s	actin	30.0374	30.5741
48s	actin	31.3062
48s	actin	30.3787
48d	actin	31.4693	32.6127
48d	actin	33.7562
48d	actin	32.6127
72t	actin	36.4352	33.9421
72t	actin	36.3071
72t	actin	29.0839
72s	actin	29.7655	29.3437
72s	actin	28.9219
72s	actin	29.3437
72d	actin	31.8353	32.4716
72d	actin	33.3278
72d	actin	32.2517
96t	actin	29.7909	29.7909
96t	actin	29.7909
96t	actin	29.7909
96s	actin	31.503	31.823
96s	actin	32.6892
96s	actin	31.2768
96d	actin	32.7667	32.4128
96d	actin	32.0589
96d	actin	32.4128
120t	actin	30.4918	30.4047
120t	actin	29.6935
120t	actin	31.0287
120d	actin	30.4918	30.4047
120d	actin	29.6935
120d	actin	31.0287
120s	actin	36.1247	35.9763
120s	actin	35.828
120s	actin	35.9763
